# Supplementary material
Source: Springer Nature journal article supplement (https://www.springermedizin.de/resource/supplementary/13054_2010_9314_MOESM2_ESM.pdf/9705918)
Supplement: MOESM2 [file 9705918]

## 'Preclinical care' data set (n = 2.973; 2004-2010)

ROSC = 1.302 (44%)  
Admission to Hospital = 1.040 (35%)

## 'Postresuscitation care' data set (n = 711; 2004-2010)

### Location of cardiac arrest:

|                |     |       |                 |     |       |
|----------------|-----|-------|-----------------|-----|-------|
| Home:          | 363 | (51%) | Nursing home:   | 43  | (6%)  |
| Work place:    | 26  | (4%)  | Doctors office: | 38  | (5%)  |
| Public street: | 102 | (14%) | Others:         | 136 | (19%) |

**Excluded:**  
**n = 127**

### Cardiac (n = 466)

Witnessed: 358 (77%)  
Bystander CPR: 86 (18%)  
VF: 226 (48%)  
Non-VF: 240 (52%)

### Non-cardiac (n = 118)

Witnessed: 82 (69%)  
Bystander CPR: 16 (14%)  
VF: 16 (14%)  
Non-VF: 102 (86%)

### VF (n = 226)

#### Treatment:

PCI: 47 (21%)  
PCI+MTH: 53 (23%)  
MTH: 37 (16%)

#### Outcome:

24 h Survival 183 (81%)  
Hospital Disc. 112 (50%)  
CPC 1+2 76 (34%)  
CPC 3+4 11 (5%)  
Dead 110 (49%)

### non VF (n = 240)

#### Treatment:

PCI: 29 (12%)  
PCI+MTH: 17 (7%)  
MTH: 42 (18%)

#### Outcome:

24 h Survival 144 (60%)  
Hospital Disc. 68 (28%)  
CPC 1+2 44 (18%)  
CPC 3+4 10 (4%)  
Dead 168 (70%)

### VF (n = 16)

#### Treatment:

PCI: 1 (6%)  
PCI+MTH: 1 (6%)  
MTH: 2 (13%)

#### Outcome:

24 h Survival 12 (75%)  
Hospital Disc. 7 (44%)  
CPC 1+2 5 (31%)  
CPC 3+4 2 (13%)  
Dead 9 (56%)

### non VF (n = 102)

#### Treatment:

PCI: 4 (4%)  
PCI+MTH: 2 (2%)  
MTH: 25 (25%)

#### Outcome:

24 h Survival 60 (59%)  
Hospital Disc. 17 (17%)  
CPC 1+2 12 (12%)  
CPC3+4 5 (5%)  
Dead 77 (75%)
